# Supplementary material for: Co-Expression Network Analysis Unveiled lncRNA-mRNA Links Correlated to Epidermal Growth Factor Receptor-Tyrosine Kinase Inhibitor Resistance and/or Intermediate Epithelial-to-Mesenchymal Transition Phenotypes in a Human Non-Small Cell Lung Cancer Cellular Model System
Source: MDPI journal article supplement (doi:10.3390/ijms25073863), 2024-03-29
Supplement: s1 [file s1]

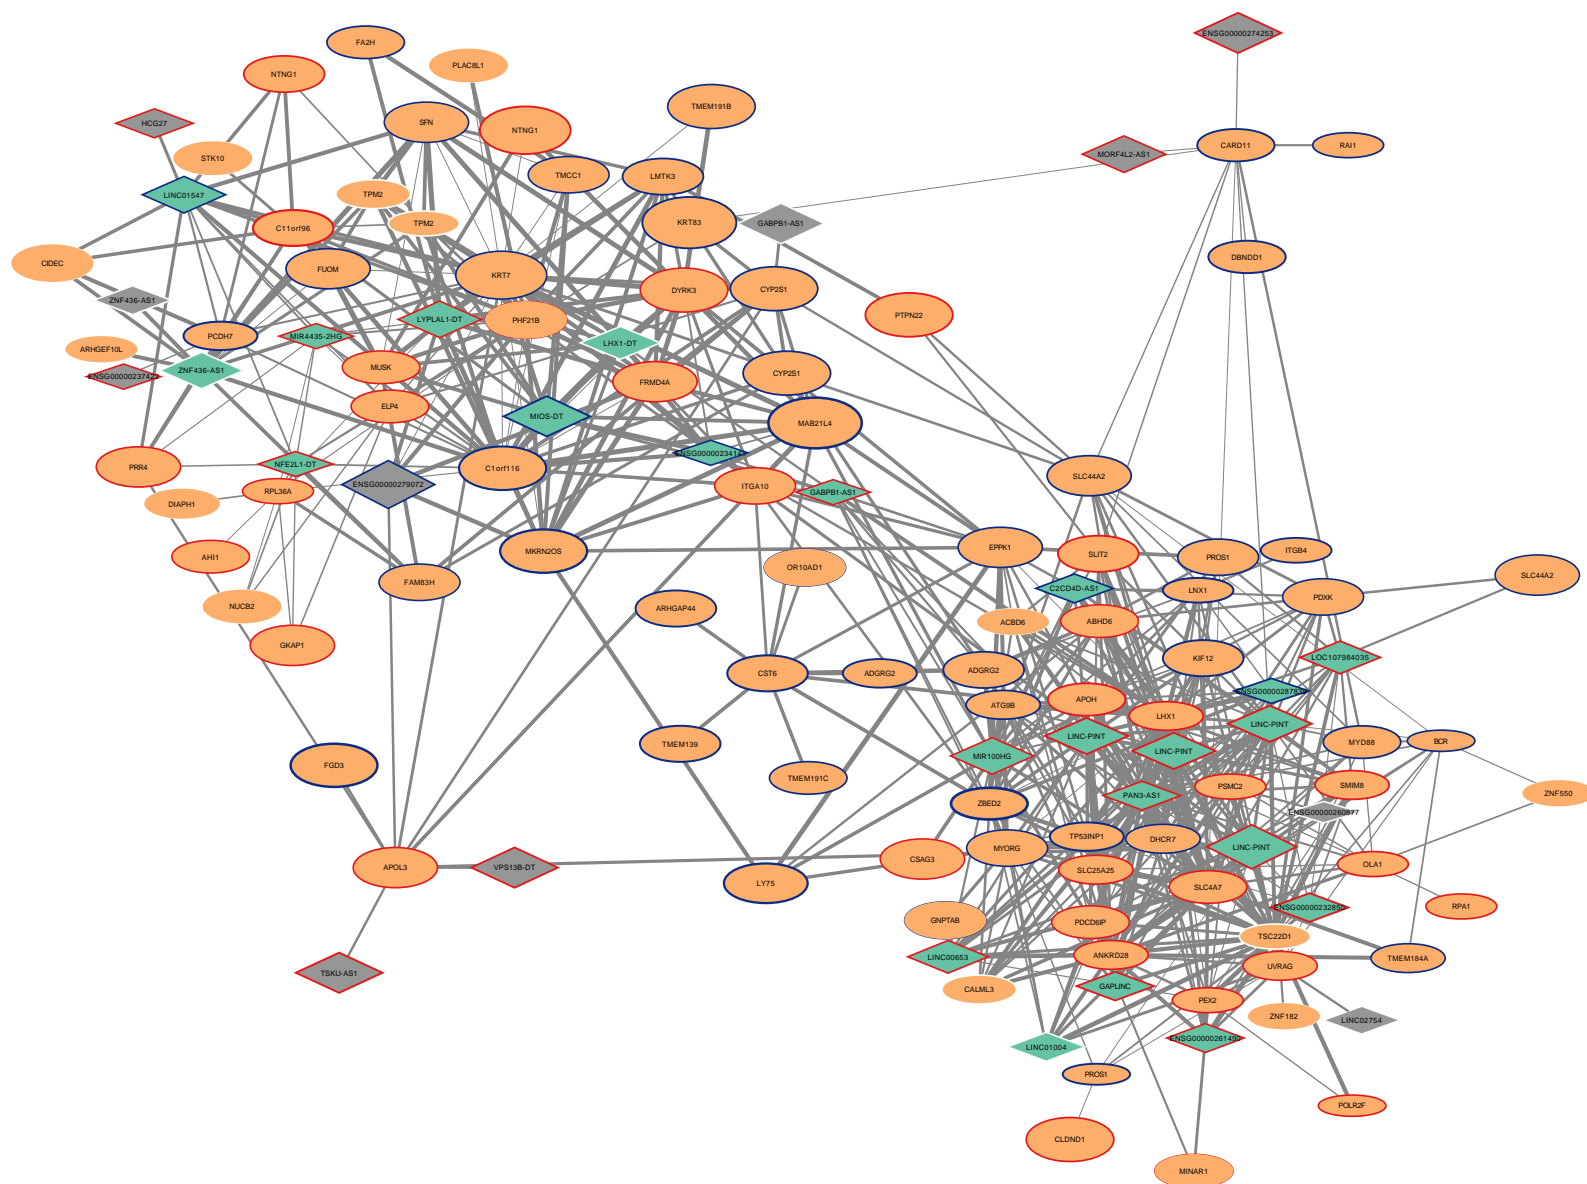

Figure S2. Network of the brown4 module. LncRNAs (diamonds) and mRNAs (ellipses) at probe-level are shown in an organic layout. Nodes are connected by edges whose sizes are proportional to their WGCNA weights: the higher, the thicker. Node size is proportional to the intramodular connectivity measure (kWithinScaled) and node border color and width indicate the fold-change between Erl-resistant/intermediate EMT, and -sensitive/epithelial NSCLC cell lines: red = up-regulation (|fold-change| > 1.5); blue = down-regulation (|fold-change| < 0.5); white = no expression variation; thickness= the higher, the thicker. Nodes of selected lncRNAs are filled in green.
