# Supplementary material for: Co-Expression Network Analysis Unveiled lncRNA-mRNA Links Correlated to Epidermal Growth Factor Receptor-Tyrosine Kinase Inhibitor Resistance and/or Intermediate Epithelial-to-Mesenchymal Transition Phenotypes in a Human Non-Small Cell Lung Cancer Cellular Model System
Source: MDPI journal article supplement (doi:10.3390/ijms25073863), 2024-03-29
Supplement: s1 [file s1]

**Table S11. Sequences of oligonucleotide primers used in qPCR in Figure 4**

| <b>Name</b>          | <b>Sequence (5'-3')</b>  |                       |
|----------------------|--------------------------|-----------------------|
| <i>LINC-PINT-FW</i>  | GAACGAGGCAAGGAGCTAAA     | <b>BROWN4</b>         |
| <i>LINC-PINT-RV</i>  | AGCAAGGCAGAGAAACTCCA     |                       |
| <i>LYPLAL1-DT-FW</i> | ACTGACTGTTGCATTCATCTCTCT |                       |
| <i>LYPLAL1-DT-RV</i> | CAGACTTTGAATGGCTATGGCAC  |                       |
| <i>MIR100HG FW</i>   | ACCCCTCCTCAGGAATGTCT     |                       |
| <i>MIR100HG RV</i>   | GCAGAGGAGGTGTCTTCAGG     |                       |
| <i>GIHCG-FW</i>      | GCTTCTCTAGTTTTCTGCCTCCT  | <b>MAGENTA4</b>       |
| <i>GIHCG-RV</i>      | ATTGTCTTCACATGCTGTGTCCA  |                       |
| <i>MIR205HG-FW</i>   | GGAGTGCAGTGGCTCAATCT     |                       |
| <i>MIR205HG-RV</i>   | TGGATTGCTTAAGCTCAGGA     |                       |
| <i>ZMIZ1-ASI-FW</i>  | ACTTTTCAGTGACTTCCACTGGT  |                       |
| <i>ZMIZ1-ASI-RV</i>  | AGCTCCCTGGTAGAATTCCT     |                       |
| <i>SATB2-ASI-FW</i>  | GTCCGGTGTGGGTTTTTGTC     | <b>PLUM4</b>          |
| <i>SATB2-ASI-RV</i>  | TTGTGCAGTAAAAAGCGTATGT   |                       |
| <i>RPL31-FW</i>      | CATCCATGGAGTGGGCTTCA     | <b>Reference gene</b> |
| <i>RPL31-RV</i>      | AGCTTTGTTGAGCCTGGTGT     |                       |
